# Supplementary material for: StemRegenin 1 Mitigates Radiation-Mediated Hematopoietic Injury by Modulating Radioresponse of Hematopoietic Stem/Progenitor Cells
Source: MDPI journal article supplement (doi:10.3390/biomedicines11030824), 2023-03-08
Supplement: s1 [file s1]

## Supplementary materials

Hwang YJ *et al.*,

### Stemregenin 1 mitigates radiation-mediated hematopoietic injury by modulating radioresponse of hematopoietic stem/progenitor cells

#### Supporting Information: Table and Figure Legends

**Supplemental Table S1. Primer sequences used in RT-PCR analysis**

| Gene   |   | Primer sequences            | Size<br>(bp) |
|--------|---|-----------------------------|--------------|
| CYP1B1 | F | 5'-CACTGCCAACACCTCTGTCT-3'  | 380          |
|        | R | 5'-CAAGGAGCTCCATGGACTCT-3'  |              |
| BCL-2  | F | 5'-TAGGATTGTGGCCTTCTTTG-3'  | 170          |
|        | R | 5'-ACAGTTCCACAAAGGCATCC-3'  |              |
| BCL-XL | F | 5'-GATCCCCATGGCAGCAGTAA-3'  | 104          |
|        | R | 5'-CCCCATCCCGGAAGAGTTCAT-3' |              |
| PUMA   | F | 5'-GTGTAGAGGAGACAGGAATC-3'  | 436          |
|        | R | 5'-GTGTAGAGGAGACAGGAATC-3'  |              |
| NOXA   | F | 5'-AAGAAGGCGCGCAAGAAC-3'    | 215          |
|        | R | 5'-CGTGCACCTCCTGAGAAAAC-3'  |              |
| BAX    | F | 5'-TTTGCTTCAGGGTTTCATCC-3'  | 246          |
|        | R | 5'-CAGTTGAAGTTGCCGTCAGA-3'  |              |
| GAPDH  | F | 5'-CGAGATCCCTCCAAAATCAA-3'  | 294          |
|        | R | 5'-TGTGGTCATGAGTCCTTCCA-3'  |              |

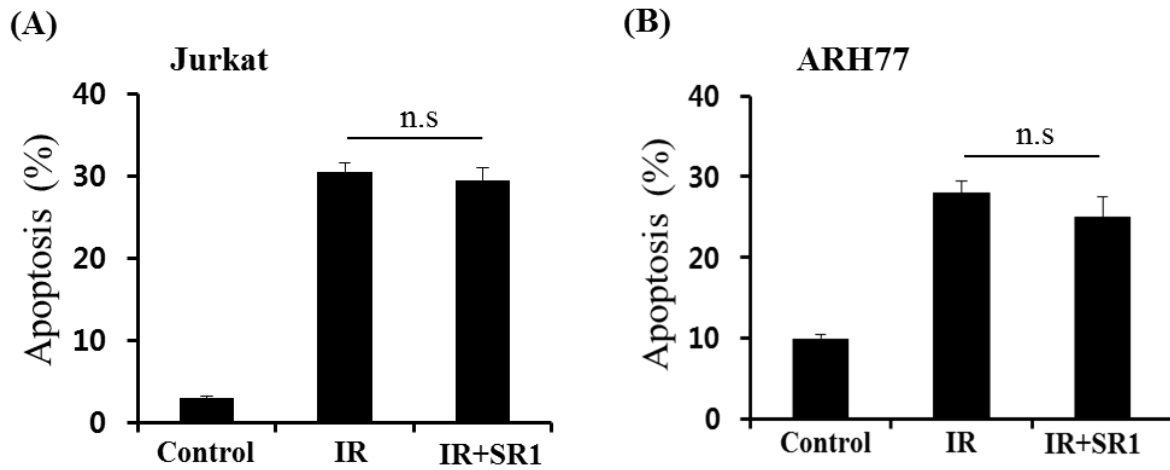

**Supplemental Figure S1. Effect of SR1 in radiation-induced apoptosis of jurkat and ARH77 cells.** Apoptotic cells of jurkat (A) and ARH77 (B) on day 3 after irradiation with/without SR1 were measured by annexin V staining using FACS analysis. The data are shown as means  $\pm$  SDs of triplicate experiments (\* $P < 0.05$ , two-tailed Student's t-tests).
